# Supplementary material for: A biomass-derived metal-free catalyst doped with phosphorus for highly efficient and selective oxidation of furfural into maleic acid
Source: Royal Society of Chemistry journal article supplement (doi:10.1039/d0gc04205f), 2021-01-01
Supplement: d0gc04205f1.pdf [file d0gc04205f1.pdf]

## Supporting Information

A biomass-derived metal-free catalyst doped with phosphorus for highly  
efficient and selective oxidation of furfural into maleic acid

Huifa Zhang<sup>a</sup>, Shaolin Wang<sup>b</sup>, Huixian Zhang<sup>c</sup>, James H. Clark<sup>d</sup>, and  
Fahai Cao<sup>a\*</sup>

<sup>a</sup> *Engineering Research Centre of Large Scale Reactor Engineering and Technology of Ministry of  
Education, East China University of Science and Technology, Shanghai 200237, China.*

<sup>b</sup> *Shanghai Key Laboratory of Green Chemistry and Chemical Processes, School of Chemistry and  
Molecular Engineering, East China Normal University, Shanghai 200062, China*

<sup>c</sup> *SINOPEC North China E&P Company, Zhengzhou 450006, China.*

<sup>d</sup> *Green Chemistry Centre of Excellence, University of York, York YO105DD, UK.*

*\*Corresponding author. E-mail: fhcao@ecust.edu.cn.*

## Catalyst characterization

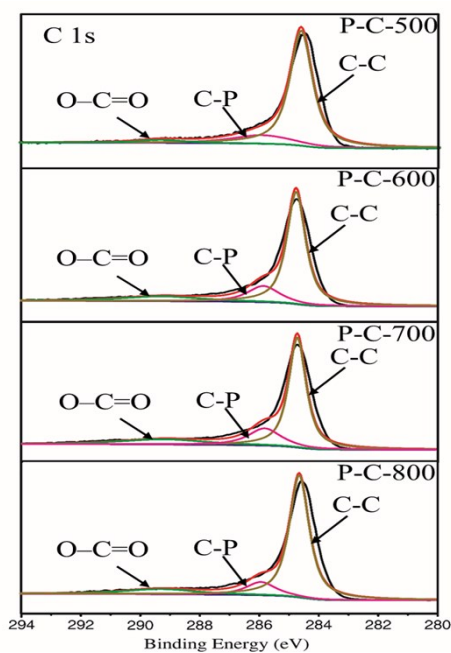

**Fig. S1.** XPS C 1s spectra of P-CT carbon samples synthesized with different annealing temperature.

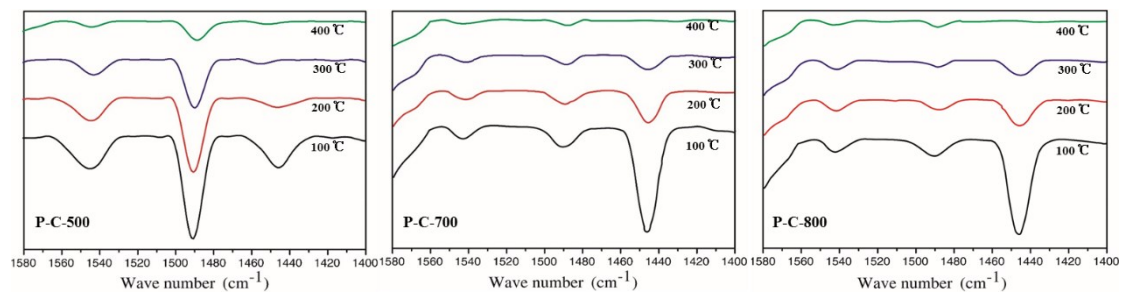

Fig. S2 Py-IR spectra of P-C-T catalysts

Table S1 Summarized acid distribution on the P-C-T catalysts

| Catalyst | Acid sites (mmol Py/gcat) |      |        |      |        |      |       |      |       |
|----------|---------------------------|------|--------|------|--------|------|-------|------|-------|
|          | Weak                      |      | Medium |      | Strong |      | Total |      | Total |
|          | B                         | L    | B      | L    | B      | L    | B     | L    | B+L   |
| P-C-500  | 0.04                      | 0.04 | 0.11   | 0.04 | 0.01   | 0.00 | 0.16  | 0.08 | 0.24  |
| P-C-600  | 0.02                      | 0.11 | 0.02   | 0.07 | 0.01   | 0.00 | 0.04  | 0.18 | 0.23  |
| P-C-700  | 0.03                      | 0.13 | 0.02   | 0.03 | 0.01   | 0.00 | 0.06  | 0.16 | 0.22  |
| P-C-800  | 0.03                      | 0.11 | 0.03   | 0.04 | 0.01   | 0.00 | 0.06  | 0.14 | 0.20  |

Estimated by Py-IR spectra of pyridine adsorption analysis

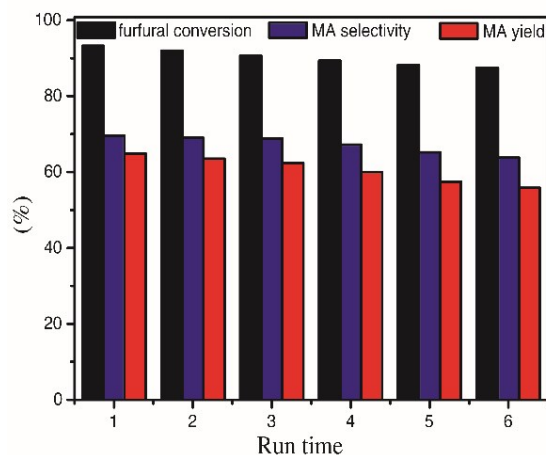

Fig. S3 Cycle usage of P-C-600 catalyst  
Reaction conditions: 60 °C, 6 h

The loading of catalyst is lower than the usage in the manuscript

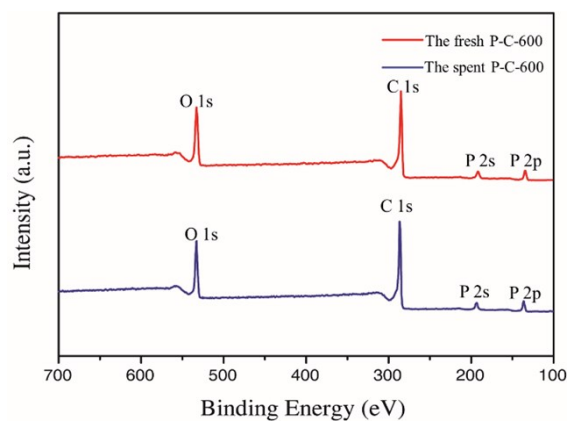

Fig. S4. XPS scan spectra of the spent P-C-600

Table S2 XPS analysis on element contents of the spent P-C-600.

| Entry | Catalyst          | Total%   |          |          | Calculated % |            |
|-------|-------------------|----------|----------|----------|--------------|------------|
|       |                   | C (at.%) | P (at.%) | O (at.%) | P-C (at.%)   | P-O (at.%) |
| 1     | The spent P-C-600 | 73.6     | 5.77     | 20.63    | 0.19         | 5.58       |

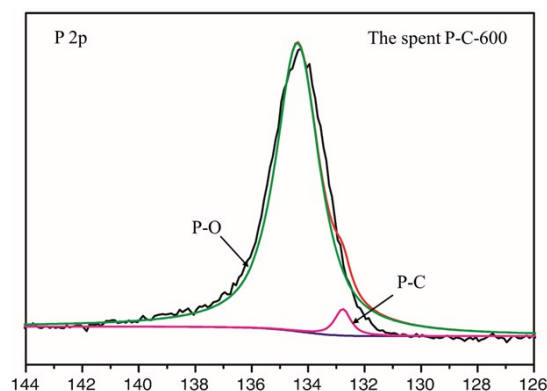

Fig. S5. XPS high-resolution P 2p spectra of the spent P-C-600

## Reaction Pathways for H<sub>2</sub>O<sub>2</sub> Oxidation of Furfural to Maleic Acid

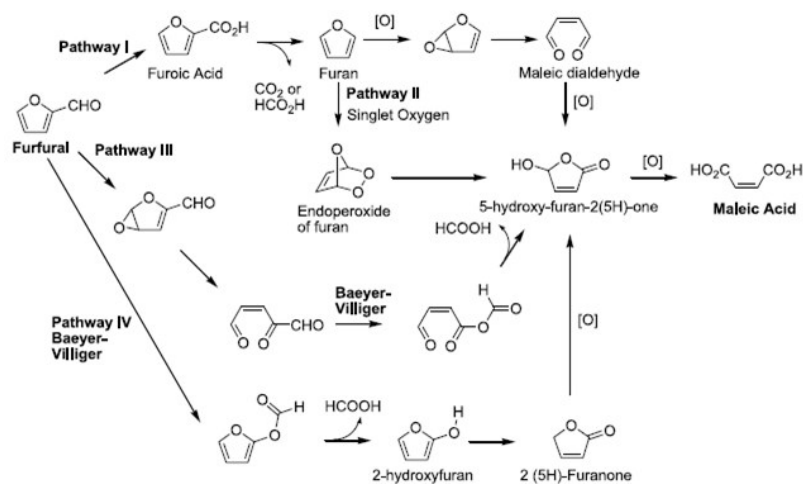

Scheme S1. The oxidation of furfural to maleic acid via four different routes (Lou, Y.; Marinkovic, S.; Estrine, B.; Qiang, W.; Enderlin, G., Oxidation of Furfural and Furan Derivatives to Maleic Acid in the Presence of a Simple Catalyst System Based on Acetic Acid and TS-1 and Hydrogen Peroxide. ACS Omega 2020, 5 (6), 2561-2568.).
